# Supplementary material for: Microstructure evolution of novel Sn islands prepared by electrodeposition as anode materials for lithium rechargeable batteries
Source: Royal Society of Chemistry journal article supplement (doi:10.1039/c7ra04959e), 2017-01-01
Supplement: c7ra04959e1.pdf [file c7ra04959e1.pdf]

## Electronic supplementary information

### Microstructure Evolution of Novel Sn Islands Prepared by Electrodeposition as Anode Materials for Lithium Rechargeable Batteries

Ryoung-Hee Kim,<sup>a</sup> KiTae Kim,<sup>b</sup> Sung-Jin Lim,<sup>a</sup> Do-Hwan Nam,<sup>a</sup> Dong-Wook Han,<sup>\*c</sup> and HyukSang Kwon<sup>\*a</sup>

<sup>a</sup> Department of Materials Science and Engineering, Korea Advanced Institute of Science and Technology, Daejeon, 34141, Republic of Korea. E-mail: hskwon@kaist.ac.kr

<sup>b</sup> Department Battery Research Institute LG Chem Research Park, Daejeon, 34122, Republic of Korea.

<sup>c</sup> Clean & Energy Materials R&D Center, Korea Automotive Technology Institute, Cheonan, 31214, Republic of Korea. E-mail: dwhan@katech.re.kr

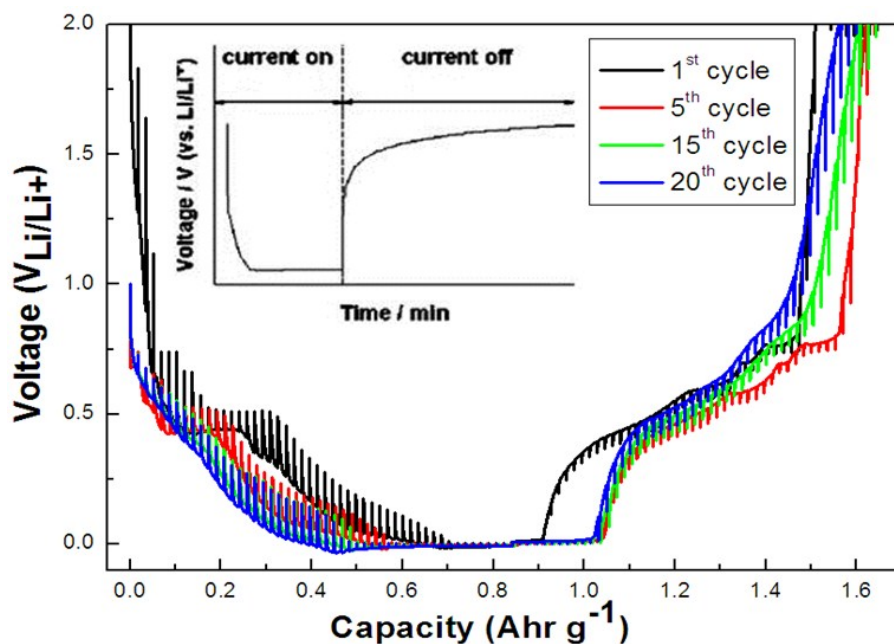

**Fig. S1** Galvanostatic intermittent titration technique (GITT) profiles of Sn islands as a function of state of charge (SOC) with cycling.
